# Supplementary material
Source: publisher site journal article supplement (https://static.cambridge.org/content/id/urn:cambridge.org:id:article:S004388711500012X/resource/name/S004388711500012X_supp_mat.pdf)
Supplement: Supplementary file 1 [file S004388711500012X_supp_mat.pdf]

## **Trade Competition and American Decolonization**

### **Supplementary Materials**

Thomas B. Pepinsky, Cornell University  
*World Politics* Volume 67, No. 3,  
July 2015

Replication materials are available at <http://tompepinsky.com/data/>.

**Table A1: Variable Definitions and Summary Statistics***Panel A: Definitions*

| <b>Variable</b>             | <b>Definition</b>                                                                                                     |
|-----------------------------|-----------------------------------------------------------------------------------------------------------------------|
| INDEPENDENCE                | Vote for independence                                                                                                 |
| COTTON                      | $\ln(1 + \text{thousands of tons of cotton produced, 1924-1932 average})$                                             |
| SUGAR BEETS                 | $\ln(1 + \text{thousands of tons of sugar beets produced, 1924-1932 average})$                                        |
| MILK                        | $\ln(\text{millions of pounds of milk produced, 1924-1932 average})$                                                  |
| COTTON (VALUE)              | $\ln(1 + \text{thousands of tons of cotton produced times average yearly cotton price, 1924-1932 average})$           |
| SUGAR BEETS (VALUE)         | $\ln(1 + \text{thousands of tons of sugar beets produced times average yearly sugar beet prices, 1924-1932 average})$ |
| MILK (VALUE)                | $\ln(\text{millions of pounds of milk produced times average yearly wholesale milk price, 1924-1932 average})$        |
| TOTAL FARM PRODUCTS (VALUE) | Total value of all farm products sold, millions of dollars, 1930                                                      |
| FILIPINOS                   | $\ln(\text{number of Filipinos per hundred thousand citizens, 1930})$                                                 |
| DEMOCRAT                    | Senator's party                                                                                                       |
| FOREIGN POLICY CONTROL      | Senate Vote #24 in 1931                                                                                               |

*Panel B: Summary Statistics*

| <b>Variable</b>             | <b>Mean</b> | <b>St. Dev.</b> | <b>Minimum</b> | <b>Maximum</b> |
|-----------------------------|-------------|-----------------|----------------|----------------|
| INDEPENDENCE                | 0.72        | 0.45            | 0              | 1              |
| COTTON                      | 2.07        | 2.66            | 0              | 7.82           |
| SUGAR BEETS                 | 7.06        | 1.12            | 4.65           | 9.29           |
| MILK                        | 2.11        | 2.97            | 0              | 8.45           |
| COTTON (VALUE)              | 5.91        | 6.86            | 0              | 16.68          |
| SUGAR BEETS (VALUE)         | 17.05       | 1.12            | 14.64          | 19.28          |
| MILK (VALUE)                | 1.41        | 2.13            | 0              | 6.52           |
| TOTAL FARM PRODUCTS (VALUE) | 200.21      | 160.17          | 9              | 666            |
| FILIPINOS                   | 1.59        | 1.86            | -1.66          | 6.29           |
| DEMOCRAT                    | 0.5         | 0.50            | 0              | 1              |
| FOREIGN POLICY CONTROL      | .58         | .80             | 0              | 2              |

**Table A2: Robustness**

| <b>Variable</b>                  | <b>Model A1</b> | <b>Model A2</b>  | <b>Model A3</b>  | <b>Model A4</b>  |
|----------------------------------|-----------------|------------------|------------------|------------------|
| <i>Fixed Effects</i>             |                 |                  |                  |                  |
| (INTERCEPT)                      | 12.83<br>(9.24) | 6.84<br>(5.63)   | 10.37<br>(10.58) | 3.33<br>(7.50)   |
| DEMOCRAT                         | 5.10*<br>(2.55) |                  | 4.87<br>(2.53)   |                  |
| FILIPINOS                        | -0.21<br>(0.32) | -0.06<br>(0.19)  | -0.20<br>(0.30)  | -0.06<br>(0.19)  |
| SUGAR BEETS (VALUE)              | 0.26*<br>(0.12) | 0.13*<br>(0.06)  | 0.26*<br>(0.12)  | 0.14*<br>(0.07)  |
| MILK (VALUE)                     | -0.90<br>(0.59) | -0.45<br>(0.34)  | -0.74<br>(0.68)  | -0.23<br>(0.47)  |
| COTTON VALUE                     | 0.89<br>(0.66)  | 1.20**<br>(0.43) | 0.93<br>(0.67)   | 1.26**<br>(0.45) |
| TOTAL FARM PRODUCTS (VALUE)      |                 |                  | -0.00<br>(0.00)  | -0.00<br>(0.00)  |
| FOREIGN POLICY CONTROL (YES)     | 1.27<br>(1.25)  | 1.35<br>(0.95)   | 1.29<br>(1.21)   | 1.43<br>(0.97)   |
| FOREIGN POLICY CONTROL (ABSTAIN) | 0.84<br>(1.32)  | 0.79<br>(0.82)   | 0.75<br>(1.30)   | 0.78<br>(0.81)   |
| <i>Random Effects</i>            |                 |                  |                  |                  |
| STATE (INTERCEPT)                | -0.21<br>(2.00) | -0.65<br>(1.97)  | -0.48<br>(3.24)  | -0.74<br>(2.30)  |
| Observations                     | 94              | 94               | 94               | 94               |

Each model is a mixed-effects logistic regression. The dependent variable is a Senator's vote for independence. Independent variables are described in Table A1. Each model has 94 observations and 48 clusters. Standard errors are in parentheses. \*  $p < 0.05$ , \*\*  $p < .01$ .

## **Data Sources**

The qualitative and quantitative data used to construct the figures and tables in this paper are drawn from the following sources.

### *Table 1*

Data on the religious composition of Hawaiian residents by ethnicity are found in Schmitt 1973, 44.

### *Figure 2: Statistics on Sugar Production and Export*

The data for Sugar Production, 1921–1940 (top) are from Stocking and Watkins 2004, 27. The data for Cane Production and Export, 1929–1933 (middle) are from Institute of Pacific Relations 1933, 5. The data for Origins of U.S. Sugar Supply, 1931–33 Average (bottom) are from Farley 1935, 177. “Other” includes the U.S. Virgin Islands and all other foreign sources.

### *Figure 3: Ownership and Concentration*

The ownership figures for the Philippines are from the “Brief of the Philippine Delegation for Independence for the Philippine Islands,” quoted in Committee on Territories and Insular Possessions 1930, 240. The ownership figures for Puerto Rico are from Diffie and Diffie 1931, 52. The concentration figures for Puerto Rico are from Diffie and Diffie 1931, 52. The concentration figures for Hawaii are from Shoemaker 1940, 27-28.

### *Figure 4: Agricultural Production by State, 1924-1932*

Same as Table 2.

*Table A1*

Data on independence votes and partisanship are from Poole 2012. Data on agricultural production by state are from the United States Department of Agriculture 2012. Data on total farm sales by state and on agricultural commodity prices used construct the measures of agricultural value are from Olmstead and Rhode 2006. Data on Filipino residents by state are from the United States Census Bureau 2012.

## References

Committee on Territories and Insular Possessions. 1930. *Independence Hearings*. Washington, DC: United States Government Printing Office.

Diffie, Bailey W. and Justine Whitfield Diffie. 1931. *Porto Rico: A Broken Pledge*. New York: The Vanguard Press.

Farley, Miriam S. 1935. "Sugar--A Commodity in Chaos." *Far Eastern Survey* 4, no. 22: 172-178.

Institute of Pacific Relations. 1933. Memorandum on Sugar. Memorandum (Institute of Pacific Relations, American Council), Vol. 2, No. 14., July 20, 1933.

Olmstead, Alan L. and Paul W. Rhode. 2006. "Tables Da423-486, Da755-76, Da780-788, and Da1020-1038." In Susan B. Carter, Scott Sigmund Gartner, Michael R. Haines, Alan L. Olmstead, Richard Sutch and Gavin Wright, eds., *Historical Statistics of the United States, Earliest Times to the Present: Millennial Edition*. New York: Cambridge University Press.

Poole, Keith. 2012. Voteview: 72nd Senate Roll Call Data.

Schmitt, R.C. 1973. "Religious Statistics of Hawaii, 1825-1972." *Hawaiian Journal of History* 7: 41-47.

Shoemaker, James H. 1940. *Labor in the territory of Hawaii, 1939*. Washington, DC: U. S. Government Printing Office.

Stocking, George W. and Myron W. Watkins. 2004. *Cartels in Action: Case Studies in International Business Diplomacy*. Buffalo: William S. Hein and Co., Inc.

United States Census Bureau. 2012. Census of Population and Housing: 1930 Census.

United States Department of Agriculture. 2012. National Agricultural Statistics Service.
